# Supplementary material for: Factors Associated With Non-participation in a Face-to-Face Second Survey Conducted 5 Years After the Baseline Survey
Source: PubMed Central journal article supplement (PMC4310872; doi:10.2188/jea.je20140116), 2015-02-05
Supplement: je-25-117-s001.pdf [file je-25-117-s001.pdf]

eTable 1. Baseline characteristics of 11,482 participants in the J-MICC Study Saga region by participation status in the face-to-face follow-up survey, and odds ratios and 95% confidence intervals of non-participation according to these characteristics, stratified by gender

| Baseline characteristics          | Male (n=4,755)          |              |                 |          | Female (n=6,727) |              |                 |          |               |
|-----------------------------------|-------------------------|--------------|-----------------|----------|------------------|--------------|-----------------|----------|---------------|
|                                   | Non-participants        | Participants | OR <sup>a</sup> | (95% CI) | Non-participants | Participants | OR <sup>a</sup> | (95% CI) |               |
| Number                            | 1,259                   | 3,496        |                 |          | 1,769            | 4,958        |                 |          |               |
| Age category                      |                         |              |                 |          |                  |              |                 |          |               |
|                                   | 40-44 years             | 182          | 333             | 2.02     | (1.56 - 2.62)    | 232          | 635             | 1.40     | (1.12 - 1.74) |
|                                   | 45-49 years             | 173          | 376             | 1.76     | (1.36 - 2.28)    | 266          | 641             | 1.54     | (1.24 - 1.91) |
|                                   | 50-54 years             | 196          | 539             | 1.31     | (1.03 - 1.67)    | 295          | 806             | 1.32     | (1.08 - 1.62) |
|                                   | 55-59 years             | 237          | 752             | 1.13     | (0.90 - 1.41)    | 334          | 1,022           | 1.16     | (0.96 - 1.40) |
|                                   | 60-64 years             | 224          | 753             | 1.00     | (ref)            | 300          | 1,030           | 1.00     | (ref)         |
|                                   | 65-69 years             | 247          | 743             | 1.07     | (0.85 - 1.33)    | 342          | 824             | 1.34     | (1.10 - 1.61) |
| Education, years (≤12 vs. >12)    |                         | 704          | 1,728           | 1.26     | (1.10 - 1.46)    | 1,122        | 2,877           | 1.20     | (1.06 - 1.36) |
| Occupational class                | High                    | 466          | 1,340           | 1.00     | (ref)            | 275          | 859             | 1.00     | (ref)         |
|                                   | Medium                  | 310          | 941             | 0.942    | (0.79 - 1.12)    | 538          | 1,471           | 1.11     | (0.93 - 1.32) |
|                                   | Low                     | 258          | 575             | 1.19     | (0.98 - 1.45)    | 201          | 467             | 1.36     | (1.08 - 1.71) |
|                                   | None                    | 223          | 634             | 1.04     | (0.83 - 1.30)    | 734          | 2,114           | 1.05     | (0.88 - 1.26) |
| Drinking status                   | Never                   | 245          | 562             | 1.00     | (ref)            | 1,022        | 2,767           | 1.00     | (ref)         |
|                                   | Former                  | 49           | 113             | 0.84     | (0.56 - 1.25)    | 53           | 102             | 1.11     | (0.78 - 1.58) |
|                                   | 0.1-22.9 g ethanol/day  | 400          | 1,304           | 0.78     | (0.64 - 0.95)    | 588          | 1,881           | 0.86     | (0.76 - 0.97) |
|                                   | 23.0-45.9 g ethanol/day | 280          | 787             | 0.86     | (0.69 - 1.06)    | 64           | 146             | 1.08     | (0.78 - 1.48) |
|                                   | ≥46 g ethanol/day       | 283          | 728             | 0.86     | (0.69 - 1.07)    | 41           | 57              | 1.36     | (0.87 - 2.12) |
| Smoking status                    | Never                   | 257          | 893             | 1.00     | (ref)            | 1,455        | 4,385           | 1.00     | (ref)         |
|                                   | Former                  | 446          | 1,439           | 1.07     | (0.90 - 1.29)    | 98           | 228             | 1.18     | (0.92 - 1.53) |
|                                   | Current                 | 556          | 1,164           | 1.47     | (1.23 - 1.77)    | 216          | 344             | 1.65     | (1.36 - 2.00) |
| Quartiles of PAL                  | Q1 (<1.402)             | 415          | 977             | 1.33     | (1.10 - 1.60)    | 439          | 936             | 1.64     | (1.38 - 1.94) |
|                                   | Q2 (1.402-1.449)        | 278          | 850             | 1.06     | (0.87 - 1.29)    | 471          | 1,287           | 1.33     | (1.13 - 1.56) |
|                                   | Q3 (1.450-1.505)        | 246          | 768             | 1.01     | (0.82 - 1.23)    | 429          | 1,329           | 1.20     | (1.02 - 1.41) |
|                                   | Q4 (≥1.506)             | 277          | 854             | 1.00     | (ref)            | 393          | 1,365           | 1.00     | (ref)         |
| Sleeping category (hours)         | <6                      | 128          | 289             | 1.34     | (1.05 - 1.71)    | 288          | 726             | 1.11     | (0.94 - 1.33) |
|                                   | ≥6 to <7                | 389          | 1,085           | 1.10     | (0.93 - 1.30)    | 642          | 1,888           | 0.99     | (0.87 - 1.14) |
|                                   | ≥7 to <8                | 433          | 1,345           | 1.00     | (ref)            | 602          | 1,738           | 1.00     | (ref)         |
|                                   | ≥8                      | 308          | 776             | 1.22     | (1.02 - 1.47)    | 235          | 605             | 1.04     | (0.87 - 1.26) |
| BMI category (kg/m <sup>2</sup> ) | <18.5                   | 40           | 102             | 0.93     | (0.62 - 1.38)    | 145          | 413             | 1.00     | (0.81 - 1.23) |
|                                   | ≥18.5 to <25            | 803          | 2,368           | 1.00     | (ref)            | 1,206        | 3,742           | 1.00     | (ref)         |
|                                   | ≥25                     | 412          | 1,022           | 1.15     | (0.99 - 1.33)    | 417          | 799             | 1.58     | (1.37 - 1.82) |
| Perceived stress                  | High                    | 331          | 796             | 1.08     | (0.89 - 1.31)    | 605          | 1,608           | 1.03     | (0.87 - 1.22) |
|                                   | Medium                  | 567          | 1,651           | 0.96     | (0.82-1.13)      | 852          | 2,421           | 1.01     | (0.87 - 1.19) |
|                                   | Low                     | 359          | 1,047           | 1.00     | (ref)            | 312          | 926             | 1.00     | (ref)         |
| Medical history <sup>b</sup>      | Hypertension            | 321          | 831             | 1.30     | (0.99 - 1.70)    | 316          | 752             | 0.81     | (0.61 - 1.09) |
|                                   | Diabetes                | 144          | 336             | 1.10     | (0.78 - 1.56)    | 85           | 172             | 1.59     | (1.00 - 2.54) |
|                                   | Dyslipidemia            | 261          | 761             | 0.97     | (0.80 - 1.18)    | 309          | 887             | 0.97     | (0.81 - 1.18) |
|                                   | Ischemic heart disease  | 50           | 158             | 0.83     | (0.63 - 1.15)    | 43           | 105             | 0.99     | (0.68 - 1.45) |
|                                   | Stroke                  | 37           | 81              | 1.25     | (0.81 - 1.93)    | 21           | 43              | 1.09     | (0.62 - 1.90) |
|                                   | Cancer                  | 62           | 184             | 1.05     | (0.77 - 1.44)    | 102          | 264             | 1.05     | (0.82 - 1.34) |
| On medication <sup>c</sup>        | Hypertension            | 252          | 696             | 0.85     | (0.63 - 1.15)    | 274          | 589             | 1.52     | (1.11 - 2.08) |
|                                   | Diabetes                | 97           | 215             | 1.17     | (0.76 - 1.78)    | 55           | 118             | 0.75     | (0.43 - 1.33) |
|                                   | Dyslipidemia            | 114          | 312             | 1.06     | (0.79 - 1.41)    | 181          | 510             | 0.89     | (0.69 - 1.13) |
|                                   | Anti-inflammatory drugs | 44           | 116             | 1.01     | (0.69 - 1.49)    | 106          | 219             | 1.24     | (0.97 - 1.60) |
|                                   | Constipation            | 44           | 62              | 1.76     | (1.14 - 2.72)    | 168          | 361             | 1.23     | (1.00 - 1.50) |
|                                   | Sleeping disorder       | 50           | 118             | 1.01     | (0.71 - 1.45)    | 116          | 234             | 1.21     | (0.94 - 1.55) |

BMI, body mass index; CI, confidence interval; OR, odds ratio; PAL, physical activity level, which was calculated as total daily energy expenditure divided by t

<sup>a</sup> Adjusted for all items listed in the table

<sup>b</sup> Compared to no history of disease
