# Supplementary material for: Factors Associated With Non-participation in a Face-to-Face Second Survey Conducted 5 Years After the Baseline Survey
Source: PubMed Central journal article supplement (PMC4310872; doi:10.2188/jea.je20140116), 2015-02-05
Supplement: je-25-117-s002.pdf [file je-25-117-s002.pdf]

eTable 2. Baseline characteristics of 2,608 people who did not participate in the face-to-face follow-up survey but participated in the health survey, by response status (mail or telephone), and odds ratios and 95% confidence intervals of telephone responses according to these characteristics, stratified by gender

| Baseline characteristics                 |                         | Male (n=1,079)   |             |                          |             | Female (n=1,529) |             |                          |             |
|------------------------------------------|-------------------------|------------------|-------------|--------------------------|-------------|------------------|-------------|--------------------------|-------------|
|                                          |                         | Telephone survey | Mail survey | Adjusted OR <sup>a</sup> | (95% CI)    | Telephone survey | Mail survey | Adjusted OR <sup>a</sup> | (95% CI)    |
| Number                                   |                         | 288              | 791         |                          |             | 260              | 1,269       |                          |             |
| Age category                             | 40-44 years             | 70               | 83          | 3.25                     | (1.88-5.62) | 40               | 148         | 1.70                     | (0.98-2.95) |
|                                          | 45-49 years             | 51               | 92          | 1.99                     | (1.14-3.46) | 41               | 182         | 1.40                     | (0.82-2.39) |
|                                          | 50-54 years             | 51               | 122         | 1.56                     | (0.92-2.63) | 44               | 216         | 1.19                     | (0.72-1.97) |
|                                          | 55-59 years             | 50               | 161         | 1.12                     | (0.67-1.88) | 55               | 240         | 1.31                     | (0.82-2.09) |
|                                          | 60-64 years             | 37               | 155         | 1.00                     | (ref)       | 40               | 225         | 1.00                     | (ref)       |
|                                          | 65-69 years             | 29               | 178         | 0.74                     | (0.41-1.30) | 40               | 258         | 0.88                     | (0.53-1.45) |
| Education, years ( $\leq 12$ vs. $>12$ ) |                         | 172              | 429         | 1.54                     | (1.11-2.13) | 159              | 816         | 0.95                     | (0.70-1.28) |
| Occupational class                       | High                    | 120              | 285         | 1.00                     | (ref)       | 44               | 182         | 1.00                     | (ref)       |
|                                          | Medium                  | 72               | 193         | 0.91                     | (0.63-1.33) | 81               | 385         | 0.84                     | (0.55-1.30) |
|                                          | Low                     | 70               | 150         | 1.07                     | (0.71-1.63) | 33               | 147         | 1.05                     | (0.61-1.79) |
|                                          | None                    | 25               | 163         | 0.53                     | (0.29-0.96) | 101              | 539         | 0.83                     | (0.54-1.26) |
| Drinking status                          | Never                   | 64               | 133         | 1.00                     | (ref)       | 155              | 734         | 1.00                     | (ref)       |
|                                          | Former                  | 9                | 30          | 0.66                     | (0.26-1.67) | 8                | 37          | 0.98                     | (0.43-2.25) |
|                                          | 0.1-22.9 g ethanol/day  | 87               | 264         | 0.63                     | (0.41-0.97) | 82               | 427         | 0.87                     | (0.64-1.19) |
|                                          | 23.0-45.9 g ethanol/day | 63               | 183         | 0.64                     | (0.40-1.00) | 11               | 41          | 1.03                     | (0.49-2.19) |
|                                          | $\geq 46$ g ethanol/day | 64               | 180         | 0.57                     | (0.36-0.91) | 4                | 29          | 0.53                     | (0.18-1.62) |
| Smoking status                           | Never                   | 50               | 169         | 1.00                     | (ref)       | 210              | 1,050       | 1.00                     | (ref)       |
|                                          | Former                  | 97               | 296         | 1.16                     | (0.76-1.77) | 8                | 77          | 0.49                     | (0.23-1.06) |
|                                          | Current                 | 141              | 326         | 1.19                     | (0.78-1.80) | 42               | 142         | 1.51                     | (1.02-2.26) |
| Quartiles of PAL                         | Q1 ( $<1.402$ )         | 81               | 271         | 1.01                     | (0.67-1.52) | 62               | 317         | 1.34                     | (0.87-2.07) |
|                                          | Q2 (1.402-1.449)        | 63               | 187         | 0.94                     | (0.61-1.44) | 73               | 332         | 1.33                     | (0.88-1.99) |
|                                          | Q3 (1.450-1.505)        | 63               | 138         | 1.35                     | (0.87-2.10) | 64               | 313         | 1.17                     | (0.78-1.76) |
|                                          | Q4 ( $\geq 1.506$ )     | 72               | 177         | 1.00                     | (ref)       | 55               | 286         | 1.00                     | (ref)       |
| Sleeping category (hours)                | $<6$                    | 31               | 70          | 1.15                     | (0.68-1.95) | 40               | 202         | 0.94                     | (0.60-1.46) |
|                                          | $\geq 6$ to $<7$        | 108              | 230         | 1.31                     | (0.92-1.87) | 103              | 450         | 1.12                     | (0.80-1.57) |
|                                          | $\geq 7$ to $<8$        | 94               | 273         | 1.00                     | (ref)       | 85               | 445         | 1.00                     | (ref)       |
|                                          | $\geq 8$                | 54               | 218         | 0.90                     | (0.59-1.37) | 31               | 171         | 1.02                     | (0.63-1.64) |
| BMI category (kg/m <sup>2</sup> )        | $<18.5$                 | 8                | 23          | 1.43                     | (0.57-3.58) | 8                | 107         | 0.36                     | (0.17-0.75) |
|                                          | $\geq 18.5$ to $<25$    | 166              | 535         | 1.00                     | (ref)       | 178              | 874         | 1.00                     | (ref)       |
|                                          | $\geq 25$               | 113              | 231         | 1.57                     | (1.15-2.14) | 74               | 287         | 1.36                     | (0.98-1.88) |
| Perceived stress                         | High                    | 82               | 202         | 1.09                     | (0.71-1.69) | 97               | 411         | 1.05                     | (0.69-1.59) |
|                                          | Medium                  | 147              | 341         | 1.50                     | (1.03-2.18) | 115              | 625         | 0.87                     | (0.59-1.29) |
|                                          | Low                     | 59               | 246         | 1.00                     | (ref)       | 48               | 233         | 1.00                     | (ref)       |
| Medical history <sup>b</sup>             | Hypertension            | 56               | 227         | 0.61                     | (0.33-1.13) | 48               | 228         | 0.77                     | (0.38-1.60) |
|                                          | Diabetes                | 29               | 85          | 0.96                     | (0.39-2.36) | 18               | 53          | 3.10                     | (1.23-7.82) |
|                                          | Dyslipidemia            | 59               | 167         | 1.17                     | (0.76-1.79) | 52               | 228         | 1.15                     | (0.70-1.77) |
|                                          | Ischemic heart disease  | 9                | 32          | 1.3                      | (0.56-3.06) | 4                | 30          | 0.69                     | (0.23-2.08) |
|                                          | Stroke                  | 6                | 26          | 1.22                     | (0.45-3.31) | 4                | 14          | 1.56                     | (0.47-5.19) |
|                                          | Cancer                  | 9                | 42          | 0.79                     | (0.36-1.76) | 14               | 72          | 0.99                     | (0.53-1.86) |
| On medication <sup>c</sup>               | Hypertension            | 46               | 178         | 1.27                     | (0.65-2.48) | 43               | 196         | 1.35                     | (0.63-2.91) |
|                                          | Diabetes                | 21               | 57          | 1.75                     | (0.61-5.03) | 9                | 38          | 0.42                     | (0.13-1.36) |
|                                          | Dyslipidemia            | 19               | 78          | 0.72                     | (0.36-1.41) | 31               | 131         | 1.10                     | (0.61-2.00) |
|                                          | Anti-inflammatory drugs | 14               | 24          | 1.97                     | (0.91-4.27) | 15               | 70          | 1.03                     | (0.56-1.91) |
|                                          | Constipation            | 6                | 30          | 0.78                     | (0.27-2.30) | 23               | 119         | 1.01                     | (0.62-1.65) |
|                                          | Sleeping disorder       | 11               | 30          | 1.48                     | (0.67-3.24) | 11               | 85          | 0.59                     | (0.29-1.20) |

BMI, body mass index; CI, confidence interval; OR, odds ratio; PAL, physical activity level, which was calculated as total daily energy expenditure divided by

<sup>a</sup> Adjusted for all items listed in the table

<sup>b</sup> Compared to no history of disease
